# Supplementary material for: Aberrant Whole Blood Gene Expression in the Lumen of Human Intracranial Aneurysms
Source: MDPI journal article supplement (doi:10.3390/diagnostics11081442), 2021-08-10
Supplement: s1 [file s1]

# **Supplemental Information for: Aberrant Whole Blood Gene Expression in the Lumen of Human Intracranial Aneurysms**

Vincent M. Tutino PhD<sup>1,2,3</sup>, Yongjun Lu PhD<sup>4</sup>, Daizo Ishii MD<sup>5</sup>, Kerry E. Poppenberg PhD<sup>1,3</sup>,  
Hamidreza Rajabzadeh-Oghaz PhD<sup>1,3</sup>, Adnan H. Siddiqui MD-PhD<sup>1,3</sup>, \*David M. Hasan MD<sup>5</sup>

<sup>1</sup>Canon Stroke and Vascular Research Center; <sup>2</sup>Department of Pathology and Anatomical Sciences, <sup>3</sup>Department of Neurosurgery, University at Buffalo, Buffalo, NY, USA

<sup>4</sup>Department of Cardiovascular Medicine, <sup>5</sup>Department of Neurosurgery, University of Iowa Hospitals and Clinics, Iowa City, IA, USA

## **\*Corresponding Author:**

David Hasan, MD

Department of Neurosurgery

1616 JCP

200 Hawkins Dr

Iowa City, IA 52242

E-mail: david-hasan@uiowa.edu

Phone: 319-384-8669

## Supplemental Tables

Supplemental Table S1. Primers Used for qPCR.\*

| Gene/<br>GenBank Acc. #        | Primer Sequence                                               | Avg. Annealing<br>Temp. (°C) | PCR Prod.<br>Length (bp) |
|--------------------------------|---------------------------------------------------------------|------------------------------|--------------------------|
| <i>ATF3</i><br>NM_001674       | 5'-CGCTGGAATCAGTCACTGTCAG-3'<br>5'-CTTGTTTCGGCACTTTGCAGCTG-3' | 62.5                         | 137                      |
| <i>CBWD6</i><br>NM_001085457.2 | 5'-GAAACGGTTGCCTCTGCTGTTC-3'<br>5'-AGGGTCTGCTAATCCAGTGGTC-3'  | 62.0                         | 119                      |
| <i>CCDC85B</i><br>NM_006848    | 5'-TCATGCAGGAGGTGAATCGGCA-3'<br>5'-AGTCCAGGAAGCAGCAGAGGTC-3'  | 64.1                         | 123                      |
| <i>CCR8</i><br>NM_005201       | 5'-TGGCTGTTGTCCATGCCGTGTA-3'<br>5'-TGGGATGGTAGCCATAATGGCG-3'  | 63.6                         | 104                      |
| <i>CHMP4B</i><br>NM_176812     | 5'-ACCAACACCGAGGTGCTCAAGA-3'<br>5'-CTGCAAGTTCTTGCTGGTCAGC-3'  | 63.3                         | 127                      |
| <i>CLEC4F</i><br>NM_173535     | 5'-CCAAGATAACCGAGGCTCGTTCA-3'<br>5'-AGGCTTCGGAACAGGTCTTGTC-3' | 62.3                         | 116                      |
| <i>CXCL10</i><br>NM_001565     | 5'-GGTGAGAAGAGATGTCTGAATCC-3'<br>5'-GTCCATCCTTGGAAGCACTGCA-3' | 60.7                         | 134                      |
| <i>FN1</i><br>NM_212482        | 5'-ACAACACCGAGGTGACTGAGAC-3'<br>5'-GGACACAACGATGCTTCCTGAG-3'  | 61.8                         | 143                      |
| <i>MT2A</i><br>NM_005953       | 5'-GAGTGCAAATGCACCTCCTGCAA-3'<br>5'-GCGTTCTTTACATCTGGGAGCG-3' | 63.1                         | 156                      |
| <i>MZT2B</i><br>NM_025029      | 5'-AGGTGCTGAGCACCGAGGAGA-3'<br>5'-GCTTCAGCAGGTCCACCAGGA-3'    | 64.9                         | 102                      |
| <i>PCSK1N</i><br>NM_013271.5   | 5'-AGGAGGCAGGCGACGAGACAC-3'<br>5'-GCTCAGAGCCACATCGTGGT-3'     | 65.6                         | 102                      |
| <i>PIM3</i><br>NM_001001852    | 5'-GGACAAGGAGAGCTTCGAGAAG-3'<br>5'-CTCCTTCACCACGTGCTTCACA-3'  | 61.7                         | 147                      |
| <i>SLC37A3</i><br>NM_032295    | 5'-GTGGGCAACATTTTGGGAGCGT-3'<br>5'-TCTGGTGACACCAGGAGTCCAA-3'  | 63.7                         | 129                      |
| <i>ST6GALNAC1</i><br>NM_018414 | 5'-CTCTCTTCCTGGACTCCAGACA-3'<br>5'-AAGCGTGTACGACCTTCTGCA-3'   | 62.7                         | 134                      |
| <i>TCN2</i><br>NM_000355       | 5'-CAGAACAGTGCGAGAGGAGATC-3'<br>5'-TCGCCTTGAGACATGCTGTTCC-3'  | 61.8                         | 121                      |
| <i>TIFAB</i><br>NM_001099221   | 5'-CTCCTTCTCAGGCATCCAGATG-3'<br>5'-CCATTTCGTCAGTTTCCTCAGCC-3' | 60.9                         | 123                      |
| <i>TNFRSF4</i><br>NM_003327    | 5'-ACAACGACGTGGTCAGCTCCAA-3'<br>5'-CAGCGGCAGACTGTGTCCTGT-3'   | 64.8                         | 112                      |

|                   |                               |      |     |
|-------------------|-------------------------------|------|-----|
| <i>UFSP1</i>      | 5'-GGAGAGGCTTTACTCGCACTTC-3'  | 60.7 | 131 |
| NM_001015072      | 5'-CCAATACCAGGACATAGGCTTCC-3' |      |     |
| <i>GAPDH</i> (HK) | 5'-AGCTCACTGGCATGGCCTTC-3'    | 62.8 | 116 |
| NM_002046         | 5'-CGCCTGCTTCACCACCTTCT-3'    |      |     |

\*All primer pairs had estimated efficiency ranging from 0.9-1.1. (Acc.=accession, Avg.=average, bp=base pair, HK=housekeeping, Prod.=product, qPCR=quantitative polymerase chain reaction, Temp.=temperature)

**Supplemental Table S2. RNA Quality and Qunatity.\***

| <b>Sample ID</b> | <b>260/280</b> | <b>260/230</b> | <b>Conc.<br/>(ng/uL)</b> |
|------------------|----------------|----------------|--------------------------|
| IA1              | 1.95           | 1.65           | 155                      |
| IA2              | 2.03           | 1.6            | 401                      |
| IA3              | 2.04           | 1.66           | 420                      |
| IA4              | 1.97           | 1.68           | 426                      |
| IA5              | 1.91           | 1.58           | 613                      |
| IA6              | 1.92           | 1.73           | 499                      |
| IA7              | 1.95           | 1.64           | 512                      |
| IA8              | 1.99           | 1.66           | 450                      |
| IA9              | 1.83           | 1.64           | 380                      |
| IA10             | 1.97           | 1.68           | 355                      |
| IA11             | 1.83           | 1.63           | 592                      |
| IA12             | 1.82           | 1.57           | 325                      |
| IA13             | 1.84           | 1.57           | 191                      |
| IA14             | 1.89           | 1.62           | 620                      |
| IA15             | 1.88           | 1.61           | 501                      |
| IA16             | 1.88           | 1.63           | 510                      |
| IA17             | 1.87           | 1.64           | 712                      |
| IA18             | 1.83           | 1.57           | 505                      |
| IA19             | 1.83           | 1.57           | 429                      |
| IA20             | 1.82           | 1.64           | 598                      |
| IA21             | 1.86           | 1.63           | 230                      |
| IA22             | 1.81           | 1.59           | 196                      |
| IA23             | 1.85           | 1.58           | 240                      |
| IA24             | 1.89           | 1.58           | 131                      |
| IA25             | 2.03           | 1.71           | 360                      |
| IA26             | 1.92           | 1.64           | 334                      |
| IA27             | 1.95           | 1.74           | 367                      |
| IA28             | 1.87           | 1.62           | 724                      |
| IA29             | 1.82           | 1.71           | 180                      |
| IA30             | 1.89           | 1.61           | 627                      |
| IA31             | 1.89           | 1.62           | 189                      |
| IA32             | 1.82           | 1.59           | 126                      |
| IA33             | 1.92           | 1.66           | 340                      |
| IA34             | 1.87           | 1.6            | 510                      |
| IA35             | 1.85           | 1.55           | 588                      |
| IA36             | 1.87           | 1.63           | 556                      |
| IA37             | 1.86           | 1.62           | 256                      |
| PV1              | 1.95           | 1.65           | 305                      |
| PV2              | 1.98           | 1.61           | 193                      |

|            |      |      |     |
|------------|------|------|-----|
| PV3        | 1.97 | 1.57 | 590 |
| PV4        | 2.00 | 1.61 | 352 |
| PV5/6      | 1.97 | 1.67 | 466 |
| PV7        | 2.06 | 1.62 | 398 |
| PV8        | 1.86 | 1.55 | 592 |
| PV9        | 1.90 | 1.57 | 140 |
| PV10       | 1.83 | 1.55 | 144 |
| PV11       | 2.01 | 1.67 | 261 |
| PV12       | 1.85 | 1.57 | 130 |
| PV13       | 2.10 | 1.68 | 235 |
| PV14       | 2.04 | 1.61 | 544 |
| PV15       | 1.89 | 1.55 | 617 |
| PV16       | 1.85 | 1.57 | 136 |
| PV17       | 1.87 | 1.56 | 136 |
| PV18       | 1.88 | 1.58 | 196 |
| PV19/20    | 1.95 | 1.62 | 401 |
| PV21       | 1.86 | 1.57 | 668 |
| PV22       | 1.81 | 1.55 | 662 |
| PV23       | 1.85 | 1.49 | 461 |
| PV24       | 1.80 | 1.59 | 521 |
| PV25       | 2.10 | 1.63 | 414 |
| PV26       | 1.85 | 1.56 | 655 |
| PV27/28/29 | 1.98 | 1.59 | 578 |
| PV30       | 1.84 | 1.64 | 550 |
| PV31       | 1.92 | 1.58 | 219 |
| PV32       | 1.90 | 1.64 | 121 |
| PV33       | 1.83 | 1.66 | 213 |
| PV34       | 1.82 | 1.62 | 191 |
| PV35       | 1.83 | 1.64 | 151 |
| PV36       | 1.85 | 1.66 | 172 |
| PV37       | 1.97 | 1.62 | 368 |

\*All RNA samples were of sufficient quality and quantity for our analyses. (Conc.=concentration, IA=intracranial aneurysm, ID=identification number, PV=parent vessel)

**Supplemental Table S3: Differential Expression Between Genes in the IA Sac and Genes in the Proximal Parent Vessel.\***

| <b>Gene</b> | <b>Log2(F-C)</b> | <b>p-value</b>      |
|-------------|------------------|---------------------|
| ATF3        | -3.091           | 0.099               |
| CBWD6       | 1.419            | <0.001 <sup>†</sup> |
| CCDC85B     | -0.225           | 0.496               |
| CCR8        | -0.731           | 0.090               |
| CHMP4B      | -0.031           | 0.113               |
| CLEC4F      | -0.996           | 0.163               |
| CXCL10      | -1.189           | 0.269               |
| FN1         | -1.528           | 0.385               |
| MT2A        | 1.349            | 0.001 <sup>†</sup>  |
| MZT2B       | 1.592            | <0.001 <sup>†</sup> |
| PCSKIN      | -0.154           | 0.182               |
| PIM3        | 0.512            | <0.001 <sup>†</sup> |
| SLC37A3     | 1.605            | <0.001 <sup>†</sup> |
| ST6GALNAC1  | -2.346           | 0.016 <sup>†</sup>  |
| TCN2        | -1.097           | 0.035 <sup>†</sup>  |
| TIFAB       | -0.709           | 0.087               |
| TNFRSF4     | 1.634            | <0.001 <sup>†</sup> |
| UFSP1       | -5.081           | <0.001 <sup>†</sup> |

\*Note: <sup>†</sup> denotes significant p-value (<0.05). (F-C=fold-change)

**Supplemental Table S4: Correlation Between Expression in the IA Sac and Expression in the Proximal Parent Vessel.\***

| <b>Gene</b>       | <b>PCC</b> | <b>p-value</b>      |
|-------------------|------------|---------------------|
| <i>ATF3</i>       | -0.070     | 0.679               |
| <i>CBWD6</i>      | 0.048      | 0.779               |
| <i>CCDC85B</i>    | -0.042     | 0.805               |
| <i>CCR8</i>       | -0.080     | 0.636               |
| <i>CHMP4B</i>     | 0.090      | 0.598               |
| <i>CLEC4F</i>     | -0.019     | 0.910               |
| <i>CXCL10</i>     | 0.649      | <0.001 <sup>†</sup> |
| <i>FN1</i>        | 0.018      | 0.918               |
| <i>MT2A</i>       | 0.385      | 0.019 <sup>†</sup>  |
| <i>MZT2B</i>      | 0.349      | 0.034 <sup>†</sup>  |
| <i>PCSK1N</i>     | -0.164     | 0.333               |
| <i>PIM3</i>       | -0.281     | 0.092               |
| <i>SLC37A3</i>    | 0.285      | 0.087               |
| <i>ST6GALNAC1</i> | 0.105      | 0.536               |
| <i>TCN2</i>       | -0.142     | 0.403               |
| <i>TIFAB</i>      | -0.158     | 0.350               |
| <i>TNFRSF4</i>    | -0.071     | 0.678               |
| <i>UFSP1</i>      | -0.168     | 0.319               |

\*Note: <sup>†</sup> denotes significant p-value (<0.05). (PCC=Pearson correlation coefficient)

**Supplemental Table S5: Correlation Between Gene Expression and IA Size.\***

| Gene              | Intraluminal |                    | Proximal Parent Vessel |         | RNA-Seq (GSE159670) |                    |
|-------------------|--------------|--------------------|------------------------|---------|---------------------|--------------------|
|                   | PCC          | p-value            | PCC                    | p-value | PCC                 | p-value            |
| <i>ATF3</i>       | -0.216       | 0.198              | 0.110                  | 0.515   | 0.095               | 0.590              |
| <i>CBWD6</i>      | -0.235       | 0.162              | 0.105                  | 0.538   | -0.007              | 0.970              |
| <i>CCDC85B</i>    | 0.185        | 0.274              | 0.015                  | 0.931   | 0.330 <sup>†</sup>  | 0.055              |
| <i>CCR8</i>       | 0.261        | 0.119              | -0.020                 | 0.909   | 0.210               | 0.220              |
| <i>CHMP4B</i>     | -0.266       | 0.111              | 0.046                  | 0.786   | 0.450               | 0.007 <sup>†</sup> |
| <i>CLEC4F</i>     | -0.003       | 0.984              | 0.024                  | 0.887   | 0.056               | 0.750              |
| <i>CXCL10</i>     | -0.173       | 0.306              | 0.031                  | 0.856   | -0.110              | 0.550              |
| <i>FN1</i>        | -0.197       | 0.242              | -0.103                 | 0.544   | -0.030              | 0.870              |
| <i>MT2A</i>       | -0.240       | 0.153              | 0.123                  | 0.469   | 0.160               | 0.360              |
| <i>MZT2B</i>      | -0.141       | 0.406              | 0.103                  | 0.544   | 0.380               | 0.027 <sup>†</sup> |
| <i>PCSK1N</i>     | -0.014       | 0.935              | 0.080                  | 0.637   | 0.350               | 0.041 <sup>†</sup> |
| <i>PIM3</i>       | -0.039       | 0.817              | 0.136                  | 0.422   | 0.350               | 0.044 <sup>†</sup> |
| <i>SLC37A3</i>    | -0.150       | 0.376              | 0.090                  | 0.598   | 0.017               | 0.920              |
| <i>ST6GALNAC1</i> | 0.471        | 0.003 <sup>†</sup> | -0.028                 | 0.867   | 0.021               | 0.900              |
| <i>TCN2</i>       | 0.153        | 0.368              | 0.050                  | 0.769   | -0.055              | 0.760              |
| <i>TIFAB</i>      | 0.352        | 0.033 <sup>†</sup> | -0.015                 | 0.928   | 0.008               | 0.960              |
| <i>TNFRSF4</i>    | -0.269       | 0.108              | 0.230                  | 0.172   | 0.180               | 0.320              |
| <i>UFSP1</i>      | 0.018        | 0.916              | -0.002                 | 0.990   | 0.330 <sup>†</sup>  | 0.056              |

\*Note: <sup>†</sup> denotes significant p-value (<0.05), <sup>‡</sup> denotes gene which had a PCC>0.3, but did not achieve a significant p-value. (RNA-Seq=RNA sequencing, PCC=Pearson correlation coefficient)

**Supplemental Table S6: Correlation Between Gene Expression and IA CR<sub>stalk</sub>.\***

| <b>Gene</b>       | <b>Intraluminal</b> |                    | <b>Proximal Parent Vessel</b> |                |
|-------------------|---------------------|--------------------|-------------------------------|----------------|
|                   | <b>PCC</b>          | <b>p-value</b>     | <b>PCC</b>                    | <b>p-value</b> |
| <i>ATF3</i>       | -0.080              | 0.639              | -0.042                        | 0.803          |
| <i>CBWD6</i>      | -0.111              | 0.512              | -0.101                        | 0.553          |
| <i>CCDC85B</i>    | 0.414               | 0.011 <sup>†</sup> | -0.253                        | 0.132          |
| <i>CCR8</i>       | 0.231               | 0.169              | -0.159                        | 0.347          |
| <i>CHMP4B</i>     | -0.109              | 0.521              | -0.210                        | 0.213          |
| <i>CLEC4F</i>     | 0.222               | 0.186              | -0.277                        | 0.097          |
| <i>CXCL10</i>     | -0.124              | 0.465              | -0.214                        | 0.204          |
| <i>FN1</i>        | -0.067              | 0.693              | -0.277                        | 0.097          |
| <i>MT2A</i>       | -0.253              | 0.131              | -0.099                        | 0.560          |
| <i>MZT2B</i>      | -0.055              | 0.746              | 0.016                         | 0.925          |
| <i>PCSK1N</i>     | 0.189               | 0.262              | -0.271                        | 0.104          |
| <i>PIM3</i>       | 0.206               | 0.221              | -0.162                        | 0.338          |
| <i>SLC37A3</i>    | -0.128              | 0.449              | -0.071                        | 0.677          |
| <i>ST6GALNAC1</i> | 0.294               | 0.077              | 0.156                         | 0.356          |
| <i>TCN2</i>       | 0.239               | 0.155              | -0.258                        | 0.124          |
| <i>TIFAB</i>      | 0.319 <sup>†</sup>  | 0.054              | -0.212                        | 0.207          |
| <i>TNFRSF4</i>    | -0.012              | 0.943              | 0.182                         | 0.281          |
| <i>UFSP1</i>      | 0.149               | 0.379              | -0.233                        | 0.164          |

\*Note: <sup>†</sup> denotes significant p-value (<0.05), <sup>‡</sup> denotes gene which had a PCC>0.3, but did not achieve a significant p-value. (PCC=Pearson correlation coefficient)
